# Supplementary material for: Interaction effects of aging, word frequency, and predictability on saccade length in Chinese reading
Source: PeerJ. 2020 Apr 1;8:e8860. doi: 10.7717/peerj.8860 (PMC7127474; doi:10.7717/peerj.8860)
Supplement: Supplemental Information 5 [file peerj-08-8860-s005.csv]

group	id	freq	item	pred	amplitude1
1	070501_3	H	W33	L	2.42
1	070501_3	H	W08	H	2.14
1	070501_3	H	W34	L	1.33
1	070501_3	H	W37	L	1.28
1	070501_3	H	W02	H	1.23
1	070501_3	H	W35	L	2.88
1	070501_3	H	W03	H	2.17
1	070501_3	H	W05	H	1.23
1	070501_3	H	W06	H	1.23
1	070501_3	H	W09	H	2.02
1	070501_3	H	W10	H	1.28
1	070501_3	H	W32	L	1.8
1	070501_3	H	W39	L	2.43
1	070501_3	H	W07	H	1.2
1	070501_3	H	W38	L	1.58
1	070501_3	H	W40	L	1.5
1	070501_3	H	W01	H	1.97
1	070502_3	H	W17	H	1.75
1	070502_3	H	W20	H	3.15
1	070502_3	H	W12	H	1.89
1	070502_3	H	W22	L	1.29
1	070502_3	H	W11	H	2.29
1	070502_3	H	W26	L	1.67
1	070502_3	H	W21	L	2.45
1	070502_3	H	W23	L	1.65
1	070502_3	H	W19	H	2.36
1	070502_3	H	W24	L	2.44
1	070502_3	H	W29	L	2.58
1	070502_3	H	W30	L	1.97
1	070503_3	H	W05	H	2.54
1	070503_3	H	W33	L	1.5
1	070503_3	H	W01	H	1.63
1	070503_3	H	W02	H	2.19
1	070503_3	H	W39	L	2.2
1	070503_3	H	W10	H	1.82
1	070503_3	H	W06	H	0.78
1	070503_3	H	W36	L	2.88
1	070503_3	H	W03	H	1.6
1	070503_3	H	W04	H	1.59
1	070503_3	H	W38	L	1.33
1	070503_3	H	W37	L	2.16
1	070503_3	H	W40	L	1.6
1	070504_3	H	W33	L	1.2
1	070504_3	H	W34	L	1.88
1	070504_3	H	W10	H	1.61
1	070504_3	H	W03	H	1.52
1	070504_3	H	W32	L	1.66
1	070504_3	H	W37	L	1.51
1	070504_3	H	W35	L	1.45
1	070504_3	H	W40	L	1.33
1	070504_3	H	W09	H	1.89
1	070504_3	H	W36	L	1.49
1	070504_3	H	W05	H	3.36
1	070504_3	H	W38	L	0.42
1	070504_3	H	W07	H	2.42
1	070504_3	H	W02	H	1.79
1	070504_3	H	W06	H	1.62
1	070504_3	H	W39	L	1.86
1	070504_3	H	W31	L	0.73
1	070505_3	H	W24	L	3.65
1	070505_3	H	W20	H	3.9
1	070505_3	H	W21	L	2.17
1	070505_3	H	W28	L	2.5
1	070505_3	H	W15	H	1.83
1	070505_3	H	W25	L	1.31
1	070505_3	H	W30	L	2.68
1	070505_3	H	W30	L	0.59
1	070505_3	H	W27	L	1.36
1	070505_3	H	W23	L	2.7
1	070505_3	H	W24	L	1.3
1	070505_3	H	W29	L	2.87
1	070505_3	H	W11	H	1.37
1	070505_3	H	W11	H	1.46
1	070506_3	H	W05	H	1.58
1	070506_3	H	W02	H	2.52
1	070506_3	H	W35	L	1.83
1	070506_3	H	W07	H	1.7
1	070506_3	H	W40	L	2.06
1	070506_3	H	W33	L	2.14
1	070506_3	H	W33	L	1.2
1	070506_3	H	W04	H	2.41
1	070506_3	H	W37	L	1.41
1	070506_3	H	W38	L	2.3
1	070506_3	H	W36	L	2.11
1	070506_3	H	W34	L	1.94
1	070506_3	H	W03	H	1.37
1	070506_3	H	W39	L	1.82
1	070506_3	H	W01	H	2.05
1	070506_3	H	W06	H	2.01
1	070506_3	H	W09	H	1.94
1	070506_3	H	W08	H	2.3
1	070507_3	H	W16	H	1.73
1	070507_3	H	W24	L	1.49
1	070507_3	H	W13	H	1.16
1	070507_3	H	W11	H	0.95
1	070507_3	H	W25	L	3.36
1	070507_3	H	W22	L	1.63
1	070507_3	H	W20	H	1.2
1	070507_3	H	W21	L	2.88
1	070507_3	H	W18	H	1.42
1	070507_3	H	W26	L	1.92
1	070507_3	H	W14	H	1.74
1	070507_3	H	W17	H	1.34
1	070507_3	H	W28	L	0.56
1	070507_3	H	W19	H	1.14
1	070507_3	H	W12	H	1.18
1	070507_3	H	W29	L	1.1
1	070508-3	H	W36	L	1.32
1	070508-3	H	W39	L	1.02
1	070508-3	H	W08	H	0.91
1	070508-3	H	W34	L	1.97
1	070508-3	H	W33	L	1.52
1	070508-3	H	W35	L	1.67
1	070508-3	H	W31	L	1.75
1	070508-3	H	W02	H	1.46
1	070508-3	H	W01	H	1.44
1	070508-3	H	W06	H	1.37
1	070508-3	H	W10	H	1.17
1	070508-3	H	W37	L	1.33
1	070508-3	H	W07	H	1.43
1	070508-3	H	W38	L	2.08
1	070509-3	H	W32	L	1.67
1	070509-3	H	W04	H	2.52
1	070509-3	H	W35	L	2.73
1	070509-3	H	W37	L	1.17
1	070509-3	H	W08	H	2.59
1	070509-3	H	W03	H	1.73
1	070509-3	H	W07	H	1.42
1	070509-3	H	W36	L	1.17
1	070509-3	H	W05	H	2.89
1	070509-3	H	W40	L	3.06
1	070509-3	H	W38	L	2.83
1	070510-3	H	W37	L	1.56
1	070510-3	H	W08	H	2.12
1	070510-3	H	W32	L	1.65
1	070510-3	H	W31	L	1.02
1	070510-3	H	W01	H	1.36
1	070510-3	H	W33	L	0.8
1	070510-3	H	W38	L	1.66
1	070510-3	H	W07	H	1.73
1	070510-3	H	W10	H	2.24
1	070510-3	H	W39	L	1.64
1	070510-3	H	W06	H	2.58
1	070510-3	H	W03	H	1.73
1	070511-3	H	W06	H	2.11
1	070511-3	H	W08	H	1.83
1	070511-3	H	W36	L	0.74
1	070511-3	H	W09	H	2.96
1	070511-3	H	W07	H	1.95
1	070511-3	H	W39	L	2.43
1	070511-3	H	W37	L	2.34
1	070511-3	H	W04	H	1.16
1	070511-3	H	W10	H	1.01
1	070511-3	H	W03	H	1.47
1	070511-3	H	W32	L	1.25
1	070511-3	H	W40	L	1.57
1	070511-3	H	W35	L	1
1	070512-3	H	W26	L	2.12
1	070512-3	H	W17	H	2.16
1	070512-3	H	W23	L	2.63
1	070512-3	H	W23	L	3.95
1	070512-3	H	W12	H	4.23
1	070512-3	H	W14	H	1.75
1	070512-3	H	W27	L	1.48
1	070512-3	H	W13	H	1.72
1	070512-3	H	W24	L	3.77
1	070512-3	H	W20	H	2.45
1	070512-3	H	W21	L	1.56
1	070512-3	H	W19	H	1.33
1	070512-3	H	W18	H	1.68
1	070601_3	H	W17	H	2.6
1	070601_3	H	W24	L	1.13
1	070601_3	H	W26	L	1.36
1	070601_3	H	W13	H	1.05
1	070601_3	H	W25	L	1.33
1	070601_3	H	W29	L	1.25
1	070601_3	H	W16	H	0.98
1	070601_3	H	W11	H	1.15
1	070601_3	H	W14	H	1.36
1	070601_3	H	W23	L	1.29
1	070601_3	H	W18	H	2.11
1	070601_3	H	W15	H	1.28
1	070601_3	H	W22	L	1.16
1	070601_3	H	W12	H	1.35
1	070601_3	H	W19	H	1.64
1	070601_3	H	W27	L	0.51
1	070602_3	H	W11	H	1.35
1	070602_3	H	W20	H	2.11
1	070602_3	H	W13	H	1.53
1	070602_3	H	W28	L	1.37
1	070602_3	H	W21	L	1.42
1	070602_3	H	W12	H	2.27
1	070602_3	H	W24	L	1.49
1	070602_3	H	W18	H	1.27
1	070602_3	H	W16	H	1.81
1	070602_3	H	W17	H	0.96
1	070602_3	H	W15	H	1.46
1	070602_3	H	W14	H	1.31
1	070602_3	H	W19	H	1.68
1	070603_3	H	W28	L	1.86
1	070603_3	H	W30	L	1.61
1	070603_3	H	W15	H	1.63
1	070603_3	H	W23	L	1.33
1	070603_3	H	W11	H	1.64
1	070603_3	H	W13	H	1.33
1	070603_3	H	W17	H	1.33
1	070603_3	H	W17	H	3.1
1	070603_3	H	W18	H	1.23
1	070603_3	H	W25	L	1.42
1	070603_3	H	W12	H	1.98
1	070603_3	H	W19	H	2.2
1	070603_3	H	W26	L	1.77
1	070603_3	H	W16	H	1.59
1	070604_3	H	W14	H	1.25
1	070604_3	H	W20	H	1.11
1	070604_3	H	W22	L	1.2
1	070604_3	H	W23	L	1.09
1	070604_3	H	W19	H	1.19
1	070604_3	H	W30	L	0.85
1	070604_3	H	W16	H	1.08
1	070604_3	H	W29	L	1.45
1	070604_3	H	W12	H	0.86
1	070604_3	H	W27	L	0.73
1	070604_3	H	W21	L	0.91
1	070604_3	H	W17	H	0.92
1	070604_3	H	W18	H	0.92
1	070605_3	H	W14	H	1.54
1	070605_3	H	W16	H	1.61
1	070605_3	H	W29	L	0.83
1	070605_3	H	W19	H	1.73
1	070605_3	H	W21	L	2.15
1	070605_3	H	W20	H	1.2
1	070605_3	H	W28	L	2.13
1	070605_3	H	W15	H	1.36
1	070605_3	H	W25	L	1.11
1	070605_3	H	W30	L	3.64
1	070605_3	H	W13	H	1.36
1	070605_3	H	W18	H	0.94
1	070605_3	H	W24	L	1.28
1	070605_3	H	W17	H	1.71
1	070605_3	H	W12	H	2.98
1	070606_3	H	W22	L	0.95
1	070606_3	H	W20	H	3.88
1	070606_3	H	W24	L	2.55
1	070606_3	H	W30	L	2.8
1	070606_3	H	W14	H	1.3
1	070606_3	H	W22	L	0.95
1	070606_3	H	W20	H	3.89
1	070606_3	H	W24	L	2.55
1	070606_3	H	W28	L	2.11
1	070606_3	H	W17	H	1.52
1	070606_3	H	W19	H	1.69
1	070606_3	H	W18	H	0.92
1	070606_3	H	W18	H	0.92
1	070606_3	H	W26	L	0.98
1	070606_3	H	W30	L	2.8
1	070606_3	H	W15	H	1.49
1	070606_3	H	W23	L	6.06
1	070606_3	H	W29	L	1.47
1	070606_3	H	W14	H	1.31
1	070606_3	H	W14	H	1.31
1	070606_3	H	W11	H	1.27
1	070607_3	H	W28	L	3.45
1	070607_3	H	W26	L	2.2
1	070607_3	H	W22	L	2.4
1	070607_3	H	W19	H	2.42
1	070607_3	H	W21	L	1.98
1	070607_3	H	W16	H	1.64
1	070607_3	H	W24	L	4.45
1	070607_3	H	W18	H	2.64
1	070607_3	H	W30	L	1.53
1	070607_3	H	W12	H	1.48
1	070607_3	H	W17	H	1.8
1	070607_3	H	W29	L	3.8
1	070607_3	H	W15	H	2.4
1	070607_3	H	W11	H	1.82
1	070607_3	H	W27	L	2.97
1	070608_3	H	W18	H	1.26
1	070608_3	H	W23	L	6.78
1	070608_3	H	W12	H	3.31
1	070608_3	H	W11	H	1.61
1	070608_3	H	W14	H	1.56
1	070608_3	H	W19	H	2.42
1	070608_3	H	W27	L	1.92
1	070608_3	H	W29	L	1.33
1	070608_3	H	W20	H	1.72
1	070608_3	H	W17	H	3.07
1	070608_3	H	W13	H	2.04
1	070608_3	H	W15	H	1.96
1	070608_3	H	W26	L	2.75
1	070608_3	H	W25	L	2.8
1	070608_3	H	W18	H	2.3
1	070608_3	H	W16	H	1.83
1	070609_3	H	W09	H	3.17
1	070609_3	H	W02	H	1.81
1	070609_3	H	W33	L	1.4
1	070609_3	H	W01	H	2.14
1	070609_3	H	W08	H	1.46
1	070609_3	H	W07	H	2.27
1	070609_3	H	W38	L	1.67
1	070609_3	H	W03	H	1.57
1	070609_3	H	W06	H	2.13
1	070609_3	H	W04	H	2
1	070609_3	H	W35	L	2.67
1	070609_3	H	W34	L	1.93
1	070610_3	H	W05	H	2.49
1	070610_3	H	W33	L	0.92
1	070610_3	H	W38	L	1.21
1	070610_3	H	W01	H	1.55
1	070610_3	H	W02	H	1.35
1	070610_3	H	W08	H	1.56
1	070610_3	H	W09	H	1.81
1	070610_3	H	W10	H	0.67
1	070610_3	H	W07	H	1.05
1	070610_3	H	W39	L	1.51
1	070611_3	H	W07	H	1.32
1	070611_3	H	W38	L	3.36
1	070611_3	H	W09	H	1.77
1	070611_3	H	W34	L	1.97
1	070611_3	H	W05	H	1.61
1	070611_3	H	W35	L	2.24
1	070611_3	H	W39	L	1.32
1	070611_3	H	W02	H	2.09
1	070611_3	H	W04	H	1.57
1	070611_3	H	W40	L	1.55
1	070611_3	H	W31	L	1.74
1	070611_3	H	W08	H	1.39
1	070611_3	H	W36	L	1.19
1	070611_3	H	W33	L	1.63
1	070611_3	H	W32	L	1.15
1	070611_3	H	W06	H	1.41
1	070611_3	H	W37	L	1.46
1	070611_3	H	W01	H	1.54
1	070612-3	H	W10	H	1.52
1	070612-3	H	W09	H	1.27
1	070612-3	H	W33	L	2.39
1	070612-3	H	W02	H	0.6
1	070612-3	H	W38	L	1.61
1	070612-3	H	W03	H	1.58
1	070612-3	H	W34	L	1.33
1	070612-3	H	W40	L	1.95
1	070612-3	H	W37	L	1.36
1	070612-3	H	W04	H	1.41
1	070612-3	H	W08	H	1.56
1	070612-3	H	W07	H	1.66
1	070612-3	H	W05	H	1.57
1	070612-3	H	W35	L	1.46
1	070613-3	H	W38	L	3.73
1	070613-3	H	W31	L	1.5
1	070613-3	H	W06	H	2.01
1	070613-3	H	W09	H	1.26
1	070613-3	H	W02	H	3.93
1	070613-3	H	W05	H	1.9
1	070613-3	H	W04	H	3.95
1	070613-3	H	W03	H	1.83
1	070613-3	H	W08	H	2.33
1	070614-3	H	W06	H	1.39
1	070614-3	H	W32	L	1.45
1	070614-3	H	W07	H	1.24
1	070614-3	H	W07	H	0.89
1	070614-3	H	W38	L	0.89
1	070614-3	H	W01	H	0.79
1	070614-3	H	W36	L	1.35
1	070614-3	H	W39	L	1.13
1	070614-3	H	W03	H	1.37
1	070614-3	H	W08	H	1.7
1	070614-3	H	W10	H	1.52
1	070614-3	H	W09	H	1.44
1	070614-3	H	W02	H	1.65
1	070614-3	H	W31	L	1.36
1	070614-3	H	W35	L	1.61
1	070614-3	H	W37	L	0.75
1	070614-3	H	W05	H	1
1	070614-3	H	W40	L	0.96
1	070614-3	H	W33	L	1.16
1	070615-3	H	W07	H	2.28
1	070615-3	H	W09	H	1.68
1	070615-3	H	W02	H	2.17
1	070615-3	H	W04	H	2.31
1	070615-3	H	W03	H	1.83
1	070615-3	H	W37	L	2.06
1	070615-3	H	W39	L	2.32
1	070615-3	H	W06	H	3.45
1	070615-3	H	W10	H	2.11
1	070615-3	H	W10	H	1.53
1	070615-3	H	W08	H	3.42
1	070615-3	H	W38	L	3.22
1	070615-3	H	W40	L	1.74
1	070616-3	H	W35	L	1.14
1	070616-3	H	W31	L	1.56
1	070616-3	H	W02	H	0.83
1	070616-3	H	W08	H	0.86
1	070616-3	H	W04	H	1.32
1	070616-3	H	W36	L	1.11
1	070616-3	H	W09	H	1.43
1	070616-3	H	W06	H	2.08
1	070616-3	H	W39	L	1.17
1	070616-3	H	W07	H	1.6
1	070616-3	H	W05	H	1.62
1	070616-3	H	W33	L	1.58
1	070616-3	H	W10	H	1.23
1	070616-3	H	W38	L	1.87
1	070616-3	H	W01	H	1.39
1	070616-3	H	W37	L	1.62
1	070616-3	H	W37	L	1.94
1	070616-3	H	W32	L	0.79
1	070701_3	H	W19	H	2.32
1	070701_3	H	W14	H	3.43
1	070701_3	H	W21	L	3.02
1	070701_3	H	W27	L	0.55
1	070701_3	H	W15	H	2.61
1	070701_3	H	W30	L	1.18
1	070701_3	H	W26	L	1.68
1	070701_3	H	W24	L	3.3
1	070701_3	H	W12	H	3.32
1	070701_3	H	W17	H	2.68
1	070701_3	H	W28	L	2.38
1	070701_3	H	W18	H	1.56
1	070701_3	H	W18	H	1.31
1	070701_3	H	W25	L	1.32
1	070701_3	H	W23	L	2.23
1	070702_3	H	W27	L	1.11
1	070702_3	H	W20	H	1.11
1	070702_3	H	W19	H	1.55
1	070702_3	H	W26	L	0.81
1	070702_3	H	W24	L	0.88
1	070702_3	H	W23	L	1.3
1	070702_3	H	W17	H	0.55
1	070702_3	H	W28	L	1.58
1	070702_3	H	W13	H	1.43
1	070703_3	H	W28	L	2.33
1	070703_3	H	W29	L	1.36
1	070703_3	H	W30	L	0.61
1	070703_3	H	W12	H	1.56
1	070703_3	H	W16	H	2.17
1	070703_3	H	W15	H	1.36
1	070703_3	H	W27	L	1.41
1	070703_3	H	W11	H	2.32
1	070703_3	H	W22	L	1.52
1	070703_3	H	W26	L	1.24
1	070703_3	H	W14	H	0.78
1	070703_3	H	W17	H	1.55
1	070704_3	H	W19	H	2.17
1	070704_3	H	W22	L	1.95
1	070704_3	H	W21	L	1.42
1	070704_3	H	W17	H	1.36
1	070704_3	H	W18	H	1.36
1	070704_3	H	W15	H	1.63
1	070704_3	H	W26	L	1.28
1	070704_3	H	W11	H	1.28
1	070704_3	H	W12	H	2.58
1	070704_3	H	W23	L	1.8
1	070704_3	H	W28	L	2.04
1	070704_3	H	W25	L	0.97
1	070704_3	H	W29	L	1.55
1	070705-3	H	W07	H	1.74
1	070705-3	H	W35	L	1.02
1	070705-3	H	W09	H	1.18
1	070705-3	H	W37	L	1.19
1	070705-3	H	W05	H	2.57
1	070705-3	H	W08	H	1.89
1	070705-3	H	W02	H	2.08
1	070705-3	H	W04	H	1.46
1	070705-3	H	W06	H	2.24
1	070705-3	H	W36	L	2.04
1	070705-3	H	W01	H	2.22
1	070705-3	H	W34	L	2.2
1	070705-3	H	W32	L	1.83
1	070705-3	H	W40	L	1.73
1	070705-3	H	W33	L	1.93
1	070705-3	H	W03	H	2.41
1	070705-3	H	W31	L	1.17
1	070705-3	H	W31	L	1.7
1	070705-3	H	W10	H	1.15
1	070705-3	H	W10	H	1.33
1	070705-3	H	W38	L	2.09
1	070706_3	H	W40	L	2.14
1	070706_3	H	W31	L	1.88
1	070706_3	H	W08	H	2.27
1	070706_3	H	W06	H	2
1	070706_3	H	W03	H	2.71
1	070706_3	H	W35	L	3.05
1	070706_3	H	W33	L	2.31
1	070706_3	H	W39	L	2.58
1	070706_3	H	W34	L	1.23
1	070706_3	H	W32	L	1.97
1	070706_3	H	W05	H	2.56
1	070706_3	H	W02	H	1.71
1	070707-3	H	W03	H	8.61
1	070707-3	H	W40	L	3.24
1	070707-3	H	W35	L	2.47
1	070707-3	H	W04	H	3.89
1	070707-3	H	W37	L	1.95
1	070707-3	H	W10	H	2.33
1	070707-3	H	W07	H	5.21
1	070707-3	H	W34	L	2.19
1	070707-3	H	W38	L	3.24
1	070707-3	H	W08	H	2.4
1	070707-3	H	W09	H	2.58
1	070708-3	H	W18	H	1.98
1	070708-3	H	W12	H	4.17
1	070708-3	H	W28	L	1.65
1	070708-3	H	W22	L	1.24
1	070708-3	H	W27	L	1.58
1	070708-3	H	W16	H	3.05
1	070708-3	H	W24	L	2.61
1	070708-3	H	W20	H	1.67
1	070708-3	H	W15	H	0.64
1	070708-3	H	W23	L	1.66
1	070708-3	H	W17	H	1.81
1	070708-3	H	W25	L	2.93
1	070708-3	H	W30	L	1.61
1	070708-3	H	W19	H	1.79
1	070708-3	H	W11	H	2.52
1	070709-3	H	W26	L	1.26
1	070709-3	H	W27	L	1.2
1	070709-3	H	W23	L	1.82
1	070709-3	H	W24	L	1.08
1	070709-3	H	W28	L	1.88
1	070709-3	H	W12	H	1.36
1	070709-3	H	W15	H	1.98
1	070709-3	H	W21	L	1.67
1	070709-3	H	W22	L	1.11
1	070709-3	H	W22	L	2.26
1	070709-3	H	W22	L	1.46
1	070709-3	H	W25	L	1.74
1	070709-3	H	W29	L	1.43
1	070709-3	H	W16	H	1.22
1	070709-3	H	W13	H	1.52
1	070709-3	H	W11	H	1.45
1	070709-3	H	W18	H	1.69
1	070709-3	H	W17	H	1.25
1	070709-3	H	W19	H	1.14
1	070709-3	H	W20	H	2.36
1	070709-3	H	W30	L	1.12
1	070710-3	H	W18	H	1.48
1	070710-3	H	W20	H	1.85
1	070710-3	H	W19	H	1.56
1	070710-3	H	W11	H	1.08
1	070710-3	H	W28	L	3.73
1	070710-3	H	W23	L	1.96
1	070710-3	H	W16	H	0.89
1	070710-3	H	W22	L	0.66
1	070710-3	H	W14	H	0.95
1	070710-3	H	W26	L	0.88
1	070710-3	H	W12	H	2.89
1	070710-3	H	W30	L	1.62
1	070710-3	H	W27	L	1.45
1	070710-3	H	W17	H	2.94
1	070711-3	H	W11	H	2.33
1	070711-3	H	W23	L	1.76
1	070711-3	H	W19	H	1.77
1	070711-3	H	W19	H	1.33
1	070711-3	H	W30	L	0.86
1	070711-3	H	W12	H	1.23
1	070711-3	H	W15	H	1.08
1	070711-3	H	W16	H	1.64
1	070711-3	H	W13	H	1.59
1	070711-3	H	W24	L	2.75
1	070711-3	H	W22	L	1.85
1	070711-3	H	W25	L	2.37
1	070711-3	H	W27	L	1.2
1	070711-3	H	W14	H	1.58
1	070711-3	H	W29	L	2.92
1	91301	H	W37	L	0.61
1	91301	H	W34	L	1.05
1	91301	H	W09	H	1.45
1	91301	H	W32	L	1.24
1	91301	H	W33	L	0.78
1	91301	H	W39	L	1.15
1	91301	H	W04	H	1.2
1	91301	H	W07	H	0.89
1	91301	H	W08	H	1.71
1	91301	H	W10	H	1.02
1	91301	H	W06	H	1.42
1	91301	H	W03	H	0.59
1	91301	H	W35	L	0.92
1	91301	H	W05	H	1.73
1	91301	H	W36	L	1.16
1	91301	H	W31	L	1.78
1	91301	H	W38	L	0.48
1	91301	H	W38	L	0.21
1	91302	H	W18	H	1.52
1	91302	H	W27	L	0.98
1	91302	H	W11	H	1.92
1	91302	H	W21	L	1.26
1	91302	H	W24	L	1.45
1	91302	H	W25	L	1.02
1	91302	H	W12	H	1.41
1	91302	H	W22	L	1.89
1	91302	H	W16	H	2.04
1	91302	H	W26	L	1.39
1	91302	H	W28	L	1.48
1	91302	H	W19	H	2.36
1	91302	H	W20	H	1.59
1	91302	H	W17	H	1.56
1	91302	H	W15	H	2.27
1	91303	H	W17	H	2.8
1	91303	H	W16	H	2.74
1	91303	H	W29	L	1.32
1	91303	H	W12	H	1.06
1	91303	H	W30	L	2
1	91303	H	W11	H	1.86
1	91303	H	W28	L	3.11
1	91303	H	W14	H	1.63
1	91303	H	W23	L	2.37
1	91303	H	W18	H	0.88
1	91303	H	W22	L	1.68
1	91303	H	W20	H	1.4
1	91303	H	W13	H	1.4
1	91303	H	W15	H	1.43
1	91303	H	W21	L	1.62
1	91303	H	W24	L	1.53
1	91303	H	W26	L	1.17
1	91303	H	W25	L	2.19
1	91304	H	W08	H	2.19
1	91304	H	W01	H	3.03
1	91304	H	W35	L	1.17
1	91304	H	W09	H	3.67
1	91304	H	W38	L	1.35
1	91304	H	W07	H	1.06
1	91304	H	W40	L	1.17
1	91304	H	W05	H	1.49
1	91304	H	W10	H	1.36
1	91304	H	W03	H	2.91
1	91304	H	W32	L	3.57
1	91304	H	W36	L	1.74
1	91304	H	W31	L	1.67
1	91304	H	W37	L	1.98
1	91304	H	W34	L	1
1	91304	H	W06	H	2.02
1	91304	H	W33	L	2.97
1	91305	H	W39	L	3.92
1	91305	H	W06	H	1.52
1	91305	H	W01	H	1.65
1	91305	H	W04	H	3.05
1	91305	H	W10	H	1.13
1	91305	H	W05	H	1.55
1	91305	H	W08	H	1.65
1	91305	H	W31	L	1.6
1	91306	H	W40	L	4.71
1	91306	H	W04	H	2.39
1	91306	H	W02	H	3.47
1	91306	H	W09	H	2.73
1	91306	H	W03	H	3.02
1	91306	H	W32	L	1.99
1	91306	H	W33	L	1.23
1	91306	H	W08	H	2.52
1	91306	H	W37	L	1.88
1	91306	H	W06	H	1.89
1	91307	H	W40	L	1.59
1	91307	H	W37	L	2.02
1	91307	H	W10	H	1.69
1	91307	H	W38	L	1.73
1	91307	H	W08	H	1.7
1	91307	H	W32	L	1.65
1	91307	H	W02	H	1.5
1	91307	H	W02	H	2.39
1	91307	H	W34	L	2.36
1	91307	H	W36	L	2.11
1	91307	H	W31	L	2.02
1	91307	H	W33	L	2.1
1	91307	H	W35	L	2.22
1	91307	H	W01	H	2.84
1	91308	H	W29	L	1.9
1	91308	H	W19	H	2.34
1	91308	H	W20	H	3.78
1	91308	H	W17	H	2.23
1	91308	H	W23	L	4.21
1	91308	H	W18	H	1.48
1	91308	H	W15	H	3.81
1	91308	H	W30	L	3.4
1	91308	H	W24	L	4.06
1	91308	H	W22	L	1.67
1	91309	H	W27	L	3.62
1	91309	H	W30	L	1.88
1	91309	H	W20	H	3.89
1	91309	H	W18	H	3.41
1	91309	H	W14	H	2.23
1	91309	H	W21	L	1.92
1	91309	H	W25	L	2.38
1	91309	H	W24	L	4.57
1	91309	H	W28	L	5.26
1	91309	H	W29	L	3.61
1	b0001	H	W22	L	0.97
1	b0001	H	W24	L	0.72
1	b0001	H	W14	H	1.59
1	b0001	H	W12	H	1.23
1	b0001	H	W18	H	1.31
1	b0001	H	W21	L	2.54
1	b0001	H	W29	L	0.92
1	b0001	H	W19	H	1.87
1	b0001	H	W28	L	2.23
1	b0001	H	W30	L	1.59
1	b0001	H	W20	H	1.03
1	b0001	H	W20	H	1.92
1	b0001	H	W27	L	1.26
1	b0001	H	W23	L	1.71
1	b0001	H	W16	H	1.8
1	b0001	H	W25	L	1.51
1	b0001	H	W15	H	1.05
1	b0001	H	W26	L	0.58
1	b0002	H	W16	H	1.62
1	b0002	H	W22	L	2.05
1	b0002	H	W15	H	3.05
1	b0002	H	W11	H	2.79
1	b0002	H	W12	H	4.06
1	b0002	H	W21	L	2.39
1	b0002	H	W30	L	1.87
1	b0002	H	W19	H	2.04
1	b0002	H	W25	L	1.89
1	b0002	H	W17	H	0.39
1	b0003	H	W19	H	1.45
1	b0003	H	W21	L	1.91
1	b0003	H	W29	L	1.21
1	b0003	H	W11	H	2
1	b0003	H	W27	L	1.36
1	b0003	H	W16	H	1.58
1	b0003	H	W14	H	1.91
1	b0003	H	W18	H	2.73
1	b0003	H	W25	L	2.8
1	b0003	H	W28	L	1.81
1	b0003	H	W12	H	2.69
1	b0003	H	W17	H	1.29
1	b0003	H	W26	L	0.95
1	b0003	H	W23	L	1.58
1	b0005	H	W25	L	0.94
1	b0005	H	W29	L	1.98
1	b0005	H	W14	H	2.19
1	b0005	H	W26	L	1.06
1	b0005	H	W28	L	3.43
1	b0005	H	W11	H	2.26
1	b0005	H	W11	H	1.37
1	b0005	H	W15	H	1.67
1	b0005	H	W18	H	2.33
1	b0005	H	W22	L	1.49
1	b0005	H	W19	H	1.82
1	b0005	H	W30	L	1.14
1	b004	H	W12	H	2.33
1	b004	H	W27	L	1.18
1	b004	H	W17	H	2.53
1	b004	H	W28	L	0.96
1	b004	H	W15	H	2.2
1	b004	H	W24	L	1.34
1	b004	H	W16	H	0.67
1	b004	H	W26	L	1.44
1	b004	H	W23	L	2.24
1	b004	H	W30	L	1.48
1	b004	H	W21	L	2.24
1	b0711	H	W14	H	1.49
1	b0711	H	W23	L	1.33
1	b0711	H	W29	L	2.83
1	b0711	H	W15	H	1.29
1	b0711	H	W20	H	1.03
1	b0711	H	W22	L	1.78
1	b0711	H	W21	L	1.09
1	b0711	H	W18	H	1.85
1	b0711	H	W28	L	2.64
1	b0711	H	W13	H	1.33
1	b0711	H	W25	L	1.17
1	b0711	H	W24	L	1.45
1	b0711	H	W16	H	1.02
1	b1001	H	W04	H	1.34
1	b1001	H	W39	L	2.28
1	b1001	H	W10	H	1.36
1	b1001	H	W36	L	1.05
1	b1001	H	W07	H	1.98
1	b1001	H	W33	L	1.45
1	b1001	H	W06	H	1.48
1	b1001	H	W31	L	1.12
1	b1001	H	W35	L	2.44
1	b1001	H	W02	H	1.07
1	b1002	H	W40	L	2.54
1	b1002	H	W07	H	1.64
1	b1002	H	W32	L	2.23
1	b1002	H	W05	H	2.62
1	b1002	H	W04	H	1.88
1	b1002	H	W39	L	1.97
1	b1002	H	W03	H	1.58
1	b1002	H	W38	L	1.03
1	b1002	H	W37	L	2.8
1	b1002	H	W10	H	0.79
1	b1002	H	W33	L	0.51
1	b1002	H	W33	L	1.29
1	b1002	H	W01	H	1.97
1	b1003	H	W38	L	3.93
1	b1003	H	W40	L	2.9
1	b1003	H	W04	H	1.36
1	b1003	H	W38	L	1.9
1	b1003	H	W07	H	3.49
1	b1003	H	W39	L	2.84
1	b1003	H	W03	H	1.7
1	b1003	H	W37	L	1.05
1	b1003	H	W36	L	1.8
1	b1003	H	W06	H	2.48
1	b1003	H	W01	H	1.48
1	b1003	H	W35	L	1.8
1	b1004	H	W10	H	1.15
1	b1004	H	W40	L	1.64
1	b1004	H	W05	H	1.49
1	b1004	H	W08	H	2.04
1	b1004	H	W07	H	1.14
1	b1004	H	W39	L	2
1	b1004	H	W32	L	0.86
1	b1004	H	W34	L	1.53
1	b1004	H	W04	H	0.98
1	b1004	H	W03	H	1.94
1	b1004	H	W31	L	0.93
1	b1004	H	W02	H	1.95
1	b1004	H	W33	L	1.43
1	b1004	H	W37	L	2.11
1	b1004	H	W01	H	2.01
1	b1004	H	W35	L	2.73
1	b1004	H	W06	H	1.93
1	b1005	H	W37	L	2.69
1	b1005	H	W04	H	1.81
1	b1005	H	W06	H	3.04
1	b1005	H	W07	H	2.24
1	b1005	H	W32	L	1.95
1	b1005	H	W01	H	1.63
1	b1005	H	W36	L	1.05
1	b1005	H	W35	L	1.77
1	b1005	H	W08	H	1.35
1	b1005	H	W33	L	1.58
1	b1005	H	W39	L	1.75
1	b1005	H	W09	H	1.27
1	b1005	H	W05	H	1.93
1	b1005	H	W40	L	1.16
1	b1005	H	W38	L	2.66
1	b1006	H	W36	L	0.81
1	b1006	H	W10	H	1.39
1	b1006	H	W01	H	1.2
1	b1006	H	W02	H	1.19
1	b1006	H	W32	L	1.29
1	b1006	H	W38	L	2.48
1	b1006	H	W37	L	1.02
1	b1006	H	W31	L	0.69
1	b1006	H	W07	H	1.27
1	b1006	H	W04	H	2.21
1	b1006	H	W09	H	2.44
1	b1006	H	W08	H	2.03
1	b1006	H	W03	H	2.33
1	b1006	H	W33	L	2.38
1	b1007	H	W30	L	2.72
1	b1007	H	W22	L	2.01
1	b1007	H	W12	H	1.56
1	b1007	H	W24	L	2.54
1	b1007	H	W25	L	2.15
1	b1007	H	W21	L	1.48
1	b1007	H	W23	L	1.46
1	b1007	H	W11	H	2.5
1	b1007	H	W13	H	2
1	b1007	H	W29	L	1.95
1	b1007	H	W18	H	1.25
1	b1007	H	W14	H	1.63
1	b1007	H	W28	L	1.17
1	b1007	H	W15	H	1.73
1	b1007	H	W26	L	1.33
1	b1007	H	W17	H	2.58
1	b1008	H	W28	L	2.02
1	b1008	H	W19	H	1.89
1	b1008	H	W25	L	3.2
1	b1008	H	W15	H	2.53
1	b1008	H	W24	L	2.89
1	b1008	H	W21	L	2.02
1	b1008	H	W17	H	1.71
1	b1008	H	W12	H	2.77
1	b1008	H	W30	L	1.61
1	b1008	H	W22	L	1.87
1	b1008	H	W18	H	2.33
1	b1008	H	W14	H	2.22
1	b1008	H	W11	H	1.59
1	b1009	H	W12	H	2.09
1	b1009	H	W17	H	1.7
1	b1009	H	W30	L	1.63
1	b1009	H	W25	L	1.73
1	b1009	H	W15	H	1.3
1	b1009	H	W13	H	0.92
1	b1009	H	W29	L	1.53
1	b1009	H	W22	L	0.93
1	b1009	H	W14	H	1.55
1	b1009	H	W21	L	1.52
1	b1009	H	W20	H	1.45
1	b1009	H	W19	H	2.52
1	b1009	H	W28	L	1.68
1	b1009	H	W24	L	3.86
1	b1009	H	W18	H	1.36
1	b1009	H	W26	L	1.23
1	b1009	H	W16	H	0.93
1	b1010	H	W19	H	2.69
1	b1010	H	W12	H	3.51
1	b1010	H	W28	L	1.4
1	b1010	H	W22	L	2.02
1	b1010	H	W15	H	2.67
1	b1010	H	W27	L	1.85
1	b1010	H	W11	H	1.12
1	b1010	H	W13	H	1.5
1	b1010	H	W26	L	1.07
1	b1010	H	W17	H	2.98
1	b1010	H	W23	L	2.53
1	b1010	H	W16	H	1.48
1	b1010	H	W18	H	2.81
1	b1011	H	W28	L	1.82
1	b1011	H	W23	L	4.55
1	b1011	H	W13	H	1.46
1	b1011	H	W14	H	1.67
1	b1011	H	W11	H	2.66
1	b1012	H	W13	H	1.32
1	b1012	H	W15	H	2.51
1	b1012	H	W23	L	5.43
1	b1012	H	W14	H	1.5
1	b1012	H	W14	H	1.5
1	b1012	H	W12	H	2.15
1	b1012	H	W24	L	1.73
1	b1012	H	W22	L	2.74
1	b1012	H	W25	L	2.37
1	b1012	H	W29	L	3.66
1	b1012	H	W20	H	2.27
1	b1012	H	W16	H	2.22
1	b1101	H	W08	H	1.43
1	b1101	H	W09	H	3.31
1	b1101	H	W34	L	3.23
1	b1101	H	W03	H	1.79
1	b1101	H	W05	H	1.35
1	b1101	H	W31	L	1.18
1	b1101	H	W07	H	1.98
1	b1101	H	W10	H	2.24
1	b1101	H	W01	H	2.06
1	b1101	H	W40	L	2.13
1	b1101	H	W39	L	3.14
1	b1101	H	W37	L	3.14
1	b1102	H	W10	H	2.13
1	b1102	H	W37	L	1.55
1	b1102	H	W40	L	1.3
1	b1102	H	W04	H	1.3
1	b1102	H	W32	L	1.81
1	b1102	H	W34	L	1.69
1	b1102	H	W33	L	1.45
1	b1102	H	W36	L	1.18
1	b1102	H	W39	L	2.08
1	b1102	H	W08	H	0.96
1	b1102	H	W35	L	2.1
1	b1102	H	W06	H	1.54
1	b1102	H	W02	H	1.76
1	b1102	H	W07	H	1.38
1	b1103	H	W37	L	2.95
1	b1103	H	W06	H	1.71
1	b1103	H	W40	L	1.78
1	b1103	H	W38	L	3.86
1	b1103	H	W01	H	2.95
1	b1103	H	W31	L	2.17
1	b1103	H	W03	H	1.58
1	b1103	H	W35	L	1.08
1	b1103	H	W02	H	1.61
1	b1103	H	W07	H	1.14
1	b1103	H	W10	H	1.43
1	b1103	H	W39	L	3.44
1	b1103	H	W33	L	2.16
1	b1103	H	W09	H	1.59
1	b1103	H	W04	H	4.09
1	b1104	H	W04	H	1.47
1	b1104	H	W34	L	2.92
1	b1104	H	W40	L	3.67
1	b1104	H	W10	H	1.8
1	b1104	H	W32	L	2.18
1	b1104	H	W38	L	2.34
1	b1104	H	W01	H	2.07
1	b1104	H	W37	L	2.07
1	b1105	H	W33	L	0.51
1	b1105	H	W32	L	0.99
1	b1105	H	W40	L	0.95
1	b1105	H	W04	H	1.2
1	b1105	H	W34	L	1.36
1	b1105	H	W06	H	1.76
1	b1105	H	W35	L	3.7
1	b1105	H	W10	H	0.64
1	b1105	H	W38	L	1.09
1	b1105	H	W37	L	1.24
1	b1105	H	W37	L	2.21
1	b1106	H	W30	L	0.84
1	b1106	H	W29	L	3.19
1	b1106	H	W23	L	1.26
1	b1106	H	W19	H	1.15
1	b1106	H	W24	L	1.75
1	b1106	H	W14	H	1.38
1	b1106	H	W21	L	0.99
1	b1106	H	W15	H	1.25
1	b1106	H	W26	L	0.95
1	b1106	H	W18	H	1.59
1	b1106	H	W28	L	1.06
1	b1106	H	W11	H	0.98
1	b1106	H	W17	H	1.64
1	b1106	H	W22	L	1.67
1	b1107	H	W30	L	1.41
1	b1107	H	W13	H	1.06
1	b1107	H	W30	L	0.9
1	b1107	H	W16	H	1.46
1	b1107	H	W11	H	1.23
1	b1107	H	W12	H	1.44
1	b1107	H	W17	H	1.48
1	b1107	H	W23	L	1.5
1	b1107	H	W20	H	2.06
1	b1107	H	W22	L	1.89
1	b1107	H	W26	L	1.44
1	b1107	H	W21	L	1.43
1	b1107	H	W19	H	1.56
1	b1107	H	W27	L	1.23
1	b1108	H	W17	H	3.93
1	b1108	H	W30	L	2.43
1	b1108	H	W18	H	2.77
1	b1108	H	W26	L	2.58
1	b1108	H	W11	H	2.23
1	b1108	H	W12	H	4.45
1	b1108	H	W27	L	2.48
1	b1108	H	W22	L	2.48
1	b1109	H	W22	L	1.74
1	b1109	H	W13	H	1.35
1	b1109	H	W11	H	4.52
1	b1109	H	W28	L	2.12
1	b1109	H	W21	L	2.92
1	b1109	H	W29	L	2.45
1	b1109	H	W16	H	1.99
1	b1109	H	W23	L	2.67
1	b1109	H	W12	H	1.89
1	b1109	H	W30	L	1.73
1	b1109	H	W14	H	1.93
1	b1109	H	W19	H	1.97
1	b1109	H	W17	H	1.92
1	b2001	H	W02	H	1.17
1	b2001	H	W35	L	1.48
1	b2001	H	W33	L	2.27
1	b2001	H	W40	L	1.34
1	b2001	H	W10	H	1.34
1	b2001	H	W07	H	1.19
1	b2001	H	W34	L	1.52
1	b2001	H	W01	H	0.55
1	b2001	H	W32	L	0.48
1	b2001	H	W03	H	2.16
1	b2001	H	W06	H	1.61
1	b2001	H	W05	H	2.32
1	b2002	H	W09	H	1.17
1	b2002	H	W31	L	1.03
1	b2002	H	W07	H	1.16
1	b2002	H	W38	L	1.03
1	b2002	H	W02	H	2.51
1	b2002	H	W03	H	1.32
1	b2002	H	W08	H	1.87
1	b2002	H	W33	L	1.25
1	b2002	H	W39	L	1.77
1	b2002	H	W36	L	0.97
1	b2002	H	W37	L	1.21
1	b2002	H	W04	H	1.4
1	b2002	H	W06	H	1.03
1	b2002	H	W35	L	1.25
1	b2002	H	W35	L	1.77
1	b2003	H	W39	L	1.12
1	b2003	H	W40	L	1.39
1	b2003	H	W37	L	1.23
1	b2003	H	W08	H	1.26
1	b2003	H	W07	H	1.32
1	b2003	H	W09	H	1.37
1	b2003	H	W05	H	1.41
1	b2003	H	W36	L	1.52
1	b2003	H	W06	H	1.61
1	b2003	H	W32	L	1.37
1	b2003	H	W31	L	1.51
1	b2003	H	W03	H	1.63
1	b2003	H	W02	H	1.42
1	b2003	H	W04	H	1.41
1	b2004	H	W03	H	1.93
1	b2004	H	W08	H	2.2
1	b2004	H	W36	L	0.92
1	b2004	H	W31	L	0.89
1	b2004	H	W05	H	1.27
1	b2004	H	W39	L	1.31
1	b2004	H	W37	L	1.87
1	b2004	H	W01	H	1.44
1	b2004	H	W07	H	1.58
1	b2004	H	W10	H	1.16
1	b2004	H	W35	L	1.79
1	b2004	H	W32	L	1.58
1	b2004	H	W38	L	1.18
1	b2004	H	W02	H	1.34
1	b2004	H	W06	H	1.95
1	b2005	H	W10	H	1.13
1	b2005	H	W38	L	1.38
1	b2005	H	W36	L	0.91
1	b2005	H	W32	L	1.91
1	b2005	H	W09	H	1.79
1	b2005	H	W40	L	1.42
1	b2005	H	W08	H	1.59
1	b2005	H	W06	H	1.83
1	b2005	H	W01	H	1.09
1	b2005	H	W05	H	1.85
1	b2005	H	W03	H	2.7
1	b2005	H	W02	H	0.82
1	b2005	H	W07	H	2.05
1	b2005	H	W37	L	2.27
1	070501_3	L	W26	H	1.08
1	070501_3	L	W30	H	1.95
1	070501_3	L	W18	L	1.55
1	070501_3	L	W29	H	1.33
1	070501_3	L	W25	H	1.24
1	070501_3	L	W25	H	1.56
1	070501_3	L	W19	L	1.54
1	070501_3	L	W16	L	1.45
1	070501_3	L	W22	H	1.61
1	070501_3	L	W24	H	4
1	070501_3	L	W12	L	4.93
1	070501_3	L	W11	L	1.3
1	070502_3	L	W02	L	2.14
1	070502_3	L	W07	L	1.64
1	070502_3	L	W33	H	1.96
1	070502_3	L	W34	H	2.21
1	070502_3	L	W36	H	1.96
1	070502_3	L	W10	L	2.05
1	070502_3	L	W37	H	2.11
1	070502_3	L	W01	L	2.25
1	070502_3	L	W39	H	3.36
1	070502_3	L	W35	H	1.86
1	070502_3	L	W08	L	2.55
1	070502_3	L	W05	L	2.13
1	070502_3	L	W40	H	3.3
1	070502_3	L	W03	L	0.73
1	070502_3	L	W32	H	2.12
1	070502_3	L	W04	L	2.76
1	070502_3	L	W38	H	1.62
1	070503_3	L	W12	L	1.35
1	070503_3	L	W27	H	1.84
1	070503_3	L	W17	L	2.11
1	070503_3	L	W16	L	0.86
1	070503_3	L	W16	L	1.43
1	070503_3	L	W14	L	1.37
1	070503_3	L	W26	H	1.14
1	070503_3	L	W25	H	1.41
1	070503_3	L	W22	H	1.7
1	070503_3	L	W15	L	1.58
1	070503_3	L	W30	H	2.26
1	070503_3	L	W19	L	3.02
1	070503_3	L	W21	H	1.8
1	070503_3	L	W18	L	1.75
1	070503_3	L	W24	H	2.84
1	070503_3	L	W29	H	2
1	070503_3	L	W23	H	2.79
1	070504_3	L	W12	L	1.83
1	070504_3	L	W11	L	1.08
1	070504_3	L	W20	L	1.36
1	070504_3	L	W23	H	1.45
1	070504_3	L	W26	H	1.38
1	070504_3	L	W26	H	1.11
1	070504_3	L	W27	H	1.28
1	070504_3	L	W30	H	1.2
1	070504_3	L	W19	L	1.83
1	070504_3	L	W18	L	1.42
1	070504_3	L	W22	H	1.97
1	070504_3	L	W24	H	1.52
1	070504_3	L	W15	L	1.54
1	070504_3	L	W28	H	1.53
1	070504_3	L	W13	L	1.77
1	070504_3	L	W17	L	1.92
1	070505_3	L	W07	L	2.36
1	070505_3	L	W07	L	5.05
1	070505_3	L	W37	H	2.01
1	070505_3	L	W38	H	2.02
1	070505_3	L	W32	H	2.6
1	070505_3	L	W40	H	1.37
1	070505_3	L	W40	H	1.11
1	070505_3	L	W39	H	2.23
1	070505_3	L	W08	L	2.52
1	070505_3	L	W33	H	2.93
1	070505_3	L	W04	L	1.32
1	070505_3	L	W09	L	0.45
1	070505_3	L	W02	L	3.02
1	070505_3	L	W06	L	0.8
1	070505_3	L	W06	L	2.08
1	070505_3	L	W35	H	2.8
1	070505_3	L	W36	H	1.13
1	070505_3	L	W05	L	0.87
1	070505_3	L	W03	L	0.83
1	070505_3	L	W03	L	2.23
1	070505_3	L	W34	H	2.27
1	070505_3	L	W31	H	1.4
1	070505_3	L	W01	L	1.97
1	070506_3	L	W11	L	1.31
1	070506_3	L	W20	L	2.96
1	070506_3	L	W27	H	1.42
1	070506_3	L	W30	H	1.6
1	070506_3	L	W24	H	2.07
1	070506_3	L	W16	L	2.27
1	070506_3	L	W17	L	2.4
1	070506_3	L	W12	L	3.47
1	070506_3	L	W19	L	1.65
1	070507_3	L	W01	L	2.83
1	070507_3	L	W36	H	1.98
1	070507_3	L	W03	L	1.19
1	070507_3	L	W05	L	1.1
1	070507_3	L	W09	L	0.58
1	070507_3	L	W38	H	1.2
1	070507_3	L	W10	L	1.35
1	070507_3	L	W08	L	1.52
1	070507_3	L	W02	L	1.18
1	070507_3	L	W31	H	0.88
1	070507_3	L	W37	H	1.35
1	070507_3	L	W39	H	0.62
1	070507_3	L	W07	L	1.28
1	070508-3	L	W24	H	2.29
1	070508-3	L	W28	H	1.12
1	070508-3	L	W19	L	1.52
1	070508-3	L	W29	H	1.3
1	070508-3	L	W15	L	1.55
1	070508-3	L	W11	L	1.21
1	070508-3	L	W11	L	1.21
1	070508-3	L	W22	H	0.89
1	070508-3	L	W26	H	1.57
1	070508-3	L	W16	L	2.08
1	070508-3	L	W30	H	1.42
1	070508-3	L	W20	L	1.11
1	070508-3	L	W12	L	1.36
1	070508-3	L	W25	H	1.7
1	070509-3	L	W19	L	1.14
1	070509-3	L	W25	H	3.09
1	070509-3	L	W17	L	2.92
1	070509-3	L	W23	H	4.37
1	070509-3	L	W24	H	2.91
1	070509-3	L	W11	L	2.52
1	070509-3	L	W18	L	2.19
1	070509-3	L	W30	H	2.33
1	070509-3	L	W22	H	1.74
1	070509-3	L	W28	H	2.89
1	070509-3	L	W26	H	1.85
1	070509-3	L	W15	L	2.52
1	070509-3	L	W16	L	2.47
1	070510-3	L	W13	L	1.24
1	070510-3	L	W28	H	1.23
1	070510-3	L	W11	L	1.55
1	070510-3	L	W15	L	2.17
1	070510-3	L	W23	H	1.21
1	070510-3	L	W27	H	0.94
1	070510-3	L	W25	H	2.86
1	070510-3	L	W24	H	3.36
1	070510-3	L	W21	H	1.57
1	070510-3	L	W12	L	2.95
1	070510-3	L	W16	L	2.27
1	070510-3	L	W14	L	1.92
1	070510-3	L	W26	H	1.09
1	070510-3	L	W22	H	1.52
1	070510-3	L	W19	L	2.25
1	070511-3	L	W30	H	1.28
1	070511-3	L	W15	L	3.23
1	070511-3	L	W29	H	3.81
1	070511-3	L	W24	H	3.41
1	070511-3	L	W22	H	0.56
1	070511-3	L	W26	H	0.88
1	070511-3	L	W12	L	1.94
1	070511-3	L	W21	H	1.79
1	070511-3	L	W11	L	2.49
1	070511-3	L	W23	H	2.91
1	070511-3	L	W28	H	1
1	070512-3	L	W40	H	2.09
1	070512-3	L	W35	H	0.98
1	070512-3	L	W08	L	1.89
1	070512-3	L	W36	H	1.52
1	070512-3	L	W06	L	9.29
1	070512-3	L	W39	H	9.09
1	070512-3	L	W10	L	1.65
1	070512-3	L	W03	L	1.83
1	070512-3	L	W32	H	2.46
1	070512-3	L	W05	L	1.87
1	070512-3	L	W02	L	4.33
1	070512-3	L	W38	H	2.61
1	070512-3	L	W33	H	2.61
1	070512-3	L	W01	L	1.95
1	070601_3	L	W34	H	1.12
1	070601_3	L	W33	H	0.85
1	070601_3	L	W01	L	1.38
1	070601_3	L	W01	L	1.59
1	070601_3	L	W40	H	1.43
1	070601_3	L	W10	L	0.95
1	070601_3	L	W31	H	0.61
1	070601_3	L	W02	L	1.89
1	070601_3	L	W08	L	1.52
1	070601_3	L	W36	H	1.42
1	070601_3	L	W09	L	0.8
1	070601_3	L	W38	H	1.38
1	070601_3	L	W35	H	1.06
1	070601_3	L	W32	H	1.21
1	070601_3	L	W04	L	1.17
1	070601_3	L	W37	H	2.41
1	070601_3	L	W03	L	0.84
1	070601_3	L	W06	L	0.95
1	070601_3	L	W07	L	1.71
1	070602_3	L	W39	H	0.86
1	070602_3	L	W09	L	0.98
1	070602_3	L	W36	H	1.86
1	070602_3	L	W04	L	2.72
1	070602_3	L	W07	L	1.07
1	070602_3	L	W37	H	2.93
1	070602_3	L	W02	L	0.92
1	070602_3	L	W05	L	0.79
1	070602_3	L	W10	L	0.82
1	070602_3	L	W06	L	0.9
1	070602_3	L	W40	H	0.95
1	070602_3	L	W33	H	1.94
1	070602_3	L	W38	H	2.39
1	070602_3	L	W03	L	2.1
1	070602_3	L	W34	H	2.02
1	070603_3	L	W09	L	1.56
1	070603_3	L	W04	L	1.79
1	070603_3	L	W38	H	1.45
1	070603_3	L	W38	H	2.23
1	070603_3	L	W40	H	1.89
1	070603_3	L	W39	H	1.58
1	070603_3	L	W01	L	1.05
1	070603_3	L	W03	L	1.61
1	070603_3	L	W06	L	1.56
1	070603_3	L	W08	L	2.4
1	070603_3	L	W07	L	1.57
1	070603_3	L	W32	H	1.68
1	070603_3	L	W31	H	1.51
1	070603_3	L	W10	L	1.44
1	070603_3	L	W33	H	1.33
1	070603_3	L	W35	H	1.78
1	070603_3	L	W05	L	1.72
1	070604_3	L	W40	H	1.35
1	070604_3	L	W08	L	1.98
1	070604_3	L	W36	H	0.84
1	070604_3	L	W02	L	0.86
1	070604_3	L	W10	L	1.33
1	070604_3	L	W34	H	1.07
1	070604_3	L	W04	L	1.52
1	070604_3	L	W38	H	1.17
1	070604_3	L	W37	H	1.82
1	070605_3	L	W02	L	0.81
1	070605_3	L	W39	H	2.02
1	070605_3	L	W01	L	2.98
1	070605_3	L	W05	L	1.31
1	070605_3	L	W33	H	2.24
1	070605_3	L	W03	L	0.61
1	070605_3	L	W10	L	0.92
1	070605_3	L	W40	H	1.02
1	070605_3	L	W35	H	1.06
1	070605_3	L	W38	H	1.36
1	070605_3	L	W07	L	0.73
1	070605_3	L	W06	L	0.85
1	070605_3	L	W08	L	0.45
1	070605_3	L	W31	H	1.09
1	070605_3	L	W09	L	1.02
1	070605_3	L	W32	H	1.18
1	070605_3	L	W37	H	1.32
1	070606_3	L	W38	H	1.48
1	070606_3	L	W32	H	1.25
1	070606_3	L	W04	L	1.16
1	070606_3	L	W40	H	2.17
1	070606_3	L	W34	H	1.36
1	070606_3	L	W38	H	1.48
1	070606_3	L	W32	H	1.25
1	070606_3	L	W03	L	1.54
1	070606_3	L	W39	H	0.98
1	070606_3	L	W33	H	1.72
1	070606_3	L	W04	L	1.16
1	070606_3	L	W07	L	1.64
1	070606_3	L	W05	L	2.45
1	070606_3	L	W40	H	2.17
1	070606_3	L	W40	H	2.17
1	070606_3	L	W34	H	1.36
1	070607_3	L	W06	L	2.02
1	070607_3	L	W34	H	1.86
1	070607_3	L	W08	L	1.06
1	070607_3	L	W07	L	3.58
1	070607_3	L	W09	L	2.11
1	070607_3	L	W33	H	1.86
1	070607_3	L	W02	L	2.61
1	070607_3	L	W05	L	2.13
1	070607_3	L	W37	H	2.29
1	070607_3	L	W35	H	2.71
1	070607_3	L	W04	L	2.53
1	070608_3	L	W02	L	2.06
1	070608_3	L	W37	H	1.9
1	070608_3	L	W10	L	2.54
1	070608_3	L	W06	L	1.48
1	070608_3	L	W40	H	1.4
1	070608_3	L	W32	H	2.27
1	070608_3	L	W38	H	1.67
1	070608_3	L	W34	H	1.98
1	070608_3	L	W09	L	1.63
1	070608_3	L	W39	H	3.49
1	070608_3	L	W31	H	1.83
1	070608_3	L	W05	L	2.19
1	070608_3	L	W03	L	1.73
1	070608_3	L	W33	H	2.42
1	070608_3	L	W07	L	2.32
1	070609_3	L	W17	L	2.58
1	070609_3	L	W30	H	1.85
1	070609_3	L	W29	H	2.24
1	070609_3	L	W22	H	1.82
1	070609_3	L	W12	L	1.97
1	070609_3	L	W16	L	2.89
1	070609_3	L	W15	L	1.43
1	070609_3	L	W25	H	1.28
1	070609_3	L	W20	L	2.79
1	070609_3	L	W23	H	2.62
1	070609_3	L	W24	H	2.21
1	070609_3	L	W19	L	1.43
1	070609_3	L	W18	L	1.55
1	070609_3	L	W28	H	1.39
1	070609_3	L	W14	L	2.29
1	070609_3	L	W21	H	2.18
1	070609_3	L	W11	L	2.16
1	070610_3	L	W12	L	1.33
1	070610_3	L	W20	L	1.26
1	070610_3	L	W19	L	1.03
1	070610_3	L	W26	H	1.17
1	070610_3	L	W11	L	1.54
1	070610_3	L	W15	L	1.11
1	070610_3	L	W29	H	1.67
1	070610_3	L	W18	L	1.28
1	070610_3	L	W22	H	1.21
1	070611_3	L	W25	H	1.61
1	070611_3	L	W26	H	1.45
1	070611_3	L	W24	H	1.75
1	070611_3	L	W30	H	1.67
1	070611_3	L	W27	H	1.45
1	070611_3	L	W12	L	1.98
1	070611_3	L	W22	H	1.93
1	070611_3	L	W15	L	1.55
1	070611_3	L	W18	L	1.23
1	070611_3	L	W16	L	2.29
1	070611_3	L	W16	L	2.14
1	070611_3	L	W19	L	1.42
1	070611_3	L	W21	H	1.58
1	070611_3	L	W29	H	1.43
1	070611_3	L	W14	L	1.34
1	070611_3	L	W28	H	1.02
1	070611_3	L	W23	H	1.95
1	070612-3	L	W15	L	1.62
1	070612-3	L	W27	H	1.58
1	070612-3	L	W28	H	1.58
1	070612-3	L	W23	H	1.43
1	070612-3	L	W20	L	1.88
1	070612-3	L	W30	H	2.58
1	070612-3	L	W29	H	1.77
1	070612-3	L	W24	H	3.48
1	070612-3	L	W19	L	1.39
1	070612-3	L	W21	H	1.35
1	070612-3	L	W22	H	1.34
1	070612-3	L	W26	H	0.92
1	070612-3	L	W17	L	1.62
1	070612-3	L	W11	L	1.22
1	070612-3	L	W14	L	1.8
1	070612-3	L	W16	L	1.71
1	070613-3	L	W30	H	2.28
1	070613-3	L	W29	H	1.89
1	070613-3	L	W22	H	0.39
1	070613-3	L	W15	L	2.28
1	070613-3	L	W16	L	1.22
1	070613-3	L	W23	H	1.5
1	070613-3	L	W13	L	3.7
1	070613-3	L	W13	L	2.19
1	070613-3	L	W21	H	2.1
1	070613-3	L	W28	H	1.89
1	070613-3	L	W18	L	3.02
1	070613-3	L	W26	H	2.45
1	070614-3	L	W18	L	1.32
1	070614-3	L	W13	L	1.52
1	070614-3	L	W24	H	1.38
1	070614-3	L	W11	L	1.05
1	070614-3	L	W12	L	0.86
1	070614-3	L	W19	L	1.43
1	070614-3	L	W30	H	0.87
1	070614-3	L	W28	H	1.66
1	070614-3	L	W26	H	0.77
1	070614-3	L	W23	H	2.08
1	070614-3	L	W14	L	1.09
1	070614-3	L	W25	H	1.39
1	070614-3	L	W29	H	1.58
1	070614-3	L	W20	L	1.55
1	070614-3	L	W22	H	1.3
1	070614-3	L	W16	L	1.31
1	070614-3	L	W21	H	1.45
1	070614-3	L	W27	H	1.18
1	070615-3	L	W29	H	1.95
1	070615-3	L	W16	L	8.77
1	070615-3	L	W26	H	1.22
1	070615-3	L	W30	H	2.55
1	070615-3	L	W19	L	2.52
1	070615-3	L	W18	L	1.17
1	070615-3	L	W11	L	2.65
1	070615-3	L	W25	H	3.61
1	070615-3	L	W14	L	1.38
1	070615-3	L	W21	H	3.17
1	070615-3	L	W28	H	3.6
1	070615-3	L	W22	H	2.18
1	070616-3	L	W11	L	1.56
1	070616-3	L	W23	H	1.86
1	070616-3	L	W26	H	1.11
1	070616-3	L	W29	H	2.07
1	070616-3	L	W24	H	1.22
1	070616-3	L	W20	L	0.86
1	070616-3	L	W16	L	1.67
1	070616-3	L	W12	L	1.3
1	070616-3	L	W28	H	1.32
1	070616-3	L	W19	L	2.65
1	070616-3	L	W15	L	1.27
1	070616-3	L	W27	H	1.57
1	070616-3	L	W13	L	1.21
1	070616-3	L	W17	L	2.46
1	070616-3	L	W22	H	0.44
1	070616-3	L	W14	L	0.97
1	070701_3	L	W35	H	2.02
1	070701_3	L	W31	H	1.99
1	070701_3	L	W06	L	2.2
1	070701_3	L	W37	H	1.58
1	070701_3	L	W07	L	7.64
1	070701_3	L	W33	H	1.8
1	070701_3	L	W39	H	1.84
1	070701_3	L	W38	H	1.13
1	070701_3	L	W09	L	1.93
1	070701_3	L	W32	H	1.78
1	070701_3	L	W04	L	1.42
1	070701_3	L	W01	L	1.43
1	070701_3	L	W01	L	0.66
1	070701_3	L	W10	L	2.22
1	070701_3	L	W03	L	1.64
1	070701_3	L	W36	H	0.83
1	070701_3	L	W40	H	1.73
1	070702_3	L	W32	H	0.77
1	070702_3	L	W38	H	1.19
1	070702_3	L	W38	H	2.04
1	070702_3	L	W02	L	1.11
1	070702_3	L	W31	H	0.67
1	070702_3	L	W07	L	0.86
1	070702_3	L	W40	H	1.51
1	070702_3	L	W09	L	1.08
1	070702_3	L	W04	L	0.95
1	070702_3	L	W05	L	0.34
1	070702_3	L	W37	H	1.32
1	070702_3	L	W35	H	1.27
1	070702_3	L	W33	H	1.08
1	070703_3	L	W37	H	1.3
1	070703_3	L	W08	L	1.41
1	070703_3	L	W31	H	1.27
1	070703_3	L	W05	L	1.12
1	070703_3	L	W34	H	2.11
1	070703_3	L	W32	H	1.72
1	070703_3	L	W03	L	0.39
1	070703_3	L	W02	L	0.98
1	070703_3	L	W38	H	0.95
1	070703_3	L	W01	L	1.83
1	070703_3	L	W04	L	1.4
1	070703_3	L	W10	L	2.02
1	070703_3	L	W07	L	1.2
1	070703_3	L	W06	L	1.45
1	070704_3	L	W39	H	1.75
1	070704_3	L	W38	H	1.7
1	070704_3	L	W40	H	1.42
1	070704_3	L	W09	L	1.43
1	070704_3	L	W08	L	1.98
1	070704_3	L	W35	H	1.8
1	070704_3	L	W37	H	1.83
1	070704_3	L	W05	L	1.83
1	070704_3	L	W01	L	1.31
1	070704_3	L	W10	L	1.98
1	070704_3	L	W32	H	1.33
1	070704_3	L	W07	L	1.62
1	070705-3	L	W23	H	2.09
1	070705-3	L	W18	L	0.77
1	070705-3	L	W28	H	2.04
1	070705-3	L	W20	L	1.27
1	070705-3	L	W19	L	1.89
1	070705-3	L	W12	L	2.03
1	070705-3	L	W29	H	2.02
1	070705-3	L	W22	H	1.77
1	070705-3	L	W15	L	1.11
1	070705-3	L	W11	L	1.83
1	070705-3	L	W13	L	1.61
1	070705-3	L	W17	L	2.36
1	070705-3	L	W21	H	1.63
1	070705-3	L	W26	H	1.21
1	070705-3	L	W30	H	1.96
1	070705-3	L	W14	L	1.5
1	070706_3	L	W12	L	5.01
1	070706_3	L	W30	H	1.23
1	070706_3	L	W17	L	0.19
1	070706_3	L	W28	H	1.52
1	070706_3	L	W18	L	2.72
1	070706_3	L	W22	H	1.73
1	070706_3	L	W16	L	2.47
1	070706_3	L	W26	H	1.7
1	070706_3	L	W20	L	3.76
1	070706_3	L	W27	H	1.59
1	070706_3	L	W15	L	1.26
1	070706_3	L	W14	L	2.3
1	070707-3	L	W22	H	1.83
1	070707-3	L	W19	L	1.92
1	070707-3	L	W19	L	4.15
1	070707-3	L	W28	H	2.17
1	070707-3	L	W24	H	3.61
1	070707-3	L	W11	L	3.98
1	070707-3	L	W23	H	4.95
1	070707-3	L	W18	L	3.47
1	070707-3	L	W15	L	2.23
1	070707-3	L	W16	L	2.41
1	070707-3	L	W26	H	1.94
1	070707-3	L	W30	H	5.23
1	070707-3	L	W17	L	2
1	070707-3	L	W27	H	1.87
1	070708-3	L	W01	L	2.46
1	070708-3	L	W33	H	3.75
1	070708-3	L	W37	H	1.17
1	070708-3	L	W03	L	1.27
1	070708-3	L	W04	L	1.2
1	070708-3	L	W04	L	1.27
1	070708-3	L	W32	H	1.74
1	070708-3	L	W09	L	7.49
1	070708-3	L	W07	L	2.65
1	070708-3	L	W38	H	1.42
1	070708-3	L	W31	H	3.27
1	070708-3	L	W02	L	2.52
1	070708-3	L	W06	L	1.2
1	070708-3	L	W35	H	1.83
1	070708-3	L	W10	L	1.8
1	070708-3	L	W39	H	2.4
1	070708-3	L	W08	L	2.84
1	070708-3	L	W36	H	1.16
1	070708-3	L	W36	H	2.96
1	070708-3	L	W05	L	4.02
1	070708-3	L	W40	H	3.45
1	070709-3	L	W01	L	1.47
1	070709-3	L	W39	H	0.86
1	070709-3	L	W40	H	2.45
1	070709-3	L	W06	L	2.02
1	070709-3	L	W05	L	1.55
1	070709-3	L	W32	H	1.4
1	070709-3	L	W03	L	1.55
1	070709-3	L	W31	H	1.76
1	070709-3	L	W09	L	0.36
1	070709-3	L	W07	L	0.8
1	070709-3	L	W34	H	2.34
1	070709-3	L	W04	L	1.2
1	070709-3	L	W02	L	1.11
1	070709-3	L	W10	L	1.39
1	070709-3	L	W36	H	1.31
1	070709-3	L	W33	H	1.33
1	070710-3	L	W40	H	1.63
1	070710-3	L	W06	L	1.56
1	070710-3	L	W37	H	1.32
1	070710-3	L	W34	H	2.9
1	070710-3	L	W38	H	3.9
1	070710-3	L	W09	L	1.15
1	070710-3	L	W05	L	0.98
1	070710-3	L	W31	H	1.07
1	070710-3	L	W08	L	1.48
1	070710-3	L	W01	L	2.08
1	070710-3	L	W03	L	1.18
1	070710-3	L	W35	H	1.76
1	070711-3	L	W37	H	1.7
1	070711-3	L	W03	L	1.02
1	070711-3	L	W36	H	1.25
1	070711-3	L	W36	H	0.84
1	070711-3	L	W08	L	0.82
1	070711-3	L	W08	L	2.02
1	070711-3	L	W39	H	1.83
1	070711-3	L	W34	H	2.02
1	070711-3	L	W01	L	1.21
1	070711-3	L	W02	L	1.31
1	070711-3	L	W38	H	0.82
1	070711-3	L	W06	L	1.36
1	070711-3	L	W05	L	3.11
1	070711-3	L	W40	H	1
1	070711-3	L	W07	L	1.2
1	070711-3	L	W32	H	1.61
1	070711-3	L	W33	H	0.74
1	91301	L	W20	L	0.9
1	91301	L	W18	L	0.74
1	91301	L	W18	L	1.1
1	91301	L	W28	H	0.86
1	91301	L	W23	H	0.92
1	91301	L	W25	H	2.39
1	91301	L	W17	L	1.02
1	91301	L	W21	H	0.92
1	91301	L	W12	L	1.03
1	91301	L	W30	H	1.02
1	91301	L	W14	L	1.34
1	91301	L	W29	H	0.67
1	91301	L	W13	L	0.46
1	91302	L	W37	H	1.81
1	91302	L	W03	L	0.82
1	91302	L	W31	H	2.14
1	91302	L	W34	H	1.52
1	91302	L	W06	L	1.91
1	91302	L	W10	L	0.8
1	91302	L	W02	L	2.85
1	91302	L	W09	L	1.64
1	91302	L	W35	H	1.48
1	91302	L	W08	L	2.41
1	91302	L	W32	H	1.4
1	91302	L	W01	L	1.06
1	91302	L	W38	H	0.74
1	91302	L	W04	L	0.95
1	91302	L	W39	H	2.16
1	91302	L	W07	L	1.04
1	91302	L	W05	L	0.58
1	91302	L	W40	H	1.39
1	91303	L	W09	L	0.99
1	91303	L	W08	L	2.56
1	91303	L	W32	H	1.22
1	91303	L	W03	L	0.91
1	91303	L	W39	H	2.36
1	91303	L	W06	L	1.5
1	91303	L	W05	L	0.75
1	91303	L	W04	L	1.74
1	91303	L	W02	L	1.27
1	91303	L	W07	L	0.98
1	91303	L	W31	H	0.97
1	91303	L	W33	H	1.83
1	91303	L	W36	H	1.09
1	91303	L	W40	H	1.64
1	91303	L	W10	L	1.27
1	91303	L	W34	H	1.9
1	91303	L	W37	H	0.89
1	91304	L	W19	L	1.9
1	91304	L	W23	H	1.61
1	91304	L	W20	L	0.7
1	91304	L	W30	H	1.15
1	91304	L	W18	L	1.17
1	91304	L	W15	L	2.39
1	91304	L	W25	H	1.76
1	91304	L	W11	L	1.15
1	91304	L	W22	H	2.26
1	91304	L	W24	H	2.03
1	91304	L	W28	H	1.18
1	91304	L	W27	H	0.65
1	91304	L	W12	L	1.02
1	91304	L	W13	L	1.7
1	91304	L	W26	H	1.76
1	91304	L	W16	L	1.67
1	91305	L	W19	L	3.85
1	91305	L	W26	H	0.87
1	91305	L	W30	H	1.77
1	91305	L	W16	L	1.71
1	91305	L	W15	L	1.91
1	91305	L	W18	L	1.76
1	91305	L	W20	L	4.3
1	91305	L	W27	H	1.17
1	91305	L	W23	H	2.16
1	91305	L	W11	L	3.78
1	91305	L	W17	L	1.98
1	91305	L	W24	H	3.79
1	91305	L	W14	L	1.93
1	91306	L	W12	L	5.21
1	91306	L	W12	L	3.77
1	91306	L	W23	H	3.52
1	91306	L	W17	L	3.55
1	91306	L	W14	L	0.61
1	91306	L	W14	L	1.7
1	91306	L	W24	H	2.04
1	91306	L	W21	H	1.98
1	91306	L	W11	L	2.62
1	91306	L	W20	L	3.81
1	91306	L	W28	H	3.53
1	91306	L	W25	H	3.42
1	91306	L	W13	L	1.67
1	91306	L	W30	H	2.21
1	91306	L	W19	L	3.36
1	91307	L	W14	L	1.77
1	91307	L	W12	L	1.64
1	91307	L	W29	H	5.94
1	91307	L	W26	H	0.96
1	91307	L	W23	H	0.94
1	91307	L	W15	L	1.81
1	91307	L	W28	H	2.11
1	91307	L	W13	L	1.6
1	91307	L	W11	L	2.63
1	91307	L	W19	L	1.59
1	91307	L	W16	L	1.83
1	91307	L	W27	H	1.98
1	91307	L	W24	H	2.3
1	91307	L	W24	H	2.81
1	91308	L	W05	L	4.11
1	91308	L	W37	H	3.47
1	91308	L	W35	H	3.89
1	91308	L	W06	L	0.55
1	91308	L	W08	L	2.95
1	91308	L	W02	L	2.09
1	91308	L	W40	H	3.03
1	91308	L	W01	L	2.33
1	91308	L	W37	H	3.48
1	91308	L	W07	L	1.74
1	91308	L	W34	H	0.27
1	91309	L	W39	H	1.61
1	91309	L	W10	L	2.46
1	91309	L	W40	H	2.13
1	91309	L	W06	L	1.69
1	91309	L	W37	H	1.3
1	91309	L	W33	H	1.2
1	91309	L	W35	H	1.62
1	91309	L	W08	L	1.93
1	91309	L	W38	H	2.86
1	b0001	L	W38	H	1.1
1	b0001	L	W32	H	1.04
1	b0001	L	W36	H	1.35
1	b0001	L	W35	H	0.65
1	b0001	L	W34	H	1.48
1	b0001	L	W01	L	1.62
1	b0001	L	W33	H	0.89
1	b0001	L	W31	H	0.77
1	b0001	L	W08	L	0.75
1	b0001	L	W05	L	1.3
1	b0001	L	W03	L	0.89
1	b0001	L	W10	L	0.98
1	b0001	L	W02	L	0.74
1	b0001	L	W39	H	1
1	b0001	L	W04	L	1.22
1	b0001	L	W07	L	0.13
1	b0002	L	W01	L	1.23
1	b0002	L	W40	H	2.3
1	b0002	L	W06	L	2.73
1	b0002	L	W03	L	2.04
1	b0002	L	W33	H	1.92
1	b0002	L	W34	H	2.62
1	b0002	L	W08	L	1.96
1	b0002	L	W32	H	1.78
1	b0002	L	W31	H	2.11
1	b0003	L	W06	L	1.07
1	b0003	L	W36	H	1.3
1	b0003	L	W10	L	1.78
1	b0003	L	W37	H	1.59
1	b0003	L	W04	L	1.33
1	b0003	L	W08	L	1.67
1	b0003	L	W32	H	1.3
1	b0003	L	W40	H	1.41
1	b0003	L	W34	H	1.76
1	b0003	L	W07	L	1.09
1	b0003	L	W31	H	1.4
1	b0003	L	W05	L	1.84
1	b0003	L	W01	L	1.39
1	b0003	L	W09	L	2.21
1	b0003	L	W03	L	1.44
1	b0005	L	W06	L	1.87
1	b0005	L	W01	L	1.8
1	b0005	L	W07	L	1.37
1	b0005	L	W36	H	0.85
1	b0005	L	W37	H	1.51
1	b0005	L	W35	H	1.91
1	b0005	L	W34	H	1.23
1	b0005	L	W39	H	1.73
1	b0005	L	W04	L	1.25
1	b0005	L	W32	H	1.8
1	b0005	L	W10	L	1.6
1	b0005	L	W40	H	1.71
1	b0005	L	W38	H	1.92
1	b0005	L	W03	L	1.5
1	b004	L	W06	L	2.07
1	b004	L	W10	L	0.89
1	b004	L	W31	H	2.14
1	b004	L	W07	L	1.19
1	b004	L	W37	H	1.76
1	b004	L	W33	H	0.74
1	b004	L	W08	L	2.7
1	b004	L	W04	L	1.97
1	b004	L	W03	L	0.62
1	b0711	L	W38	H	2.68
1	b0711	L	W39	H	1.88
1	b0711	L	W04	L	1.25
1	b0711	L	W40	H	2.92
1	b0711	L	W10	L	1.25
1	b0711	L	W01	L	1.03
1	b0711	L	W36	H	1.15
1	b0711	L	W07	L	1.1
1	b0711	L	W02	L	0.86
1	b0711	L	W35	H	1.33
1	b0711	L	W34	H	1.72
1	b0711	L	W06	L	2.01
1	b0711	L	W09	L	1.33
1	b0711	L	W37	H	1.83
1	b0711	L	W08	L	1.04
1	b0711	L	W05	L	1.34
1	b1001	L	W14	L	1.18
1	b1001	L	W19	L	1.45
1	b1001	L	W25	H	1.12
1	b1001	L	W24	H	1.15
1	b1001	L	W15	L	0.86
1	b1001	L	W27	H	0.8
1	b1001	L	W17	L	0.9
1	b1001	L	W26	H	1.28
1	b1001	L	W30	H	2.23
1	b1001	L	W29	H	1.88
1	b1001	L	W18	L	1.86
1	b1001	L	W21	H	0.77
1	b1001	L	W28	H	1.83
1	b1001	L	W23	H	2.36
1	b1002	L	W21	H	1.38
1	b1002	L	W18	L	1.21
1	b1002	L	W24	H	3.27
1	b1002	L	W30	H	0.96
1	b1002	L	W29	H	1.38
1	b1002	L	W11	L	2.1
1	b1002	L	W12	L	2.84
1	b1002	L	W28	H	2.76
1	b1002	L	W19	L	2.52
1	b1002	L	W20	L	3.27
1	b1002	L	W23	H	1.87
1	b1003	L	W14	L	1.56
1	b1003	L	W21	H	2.05
1	b1003	L	W30	H	1.36
1	b1003	L	W28	H	1.45
1	b1003	L	W19	L	2.73
1	b1003	L	W18	L	3.55
1	b1003	L	W16	L	1.47
1	b1003	L	W22	H	2.5
1	b1003	L	W17	L	1.82
1	b1003	L	W26	H	1.49
1	b1004	L	W14	L	2.56
1	b1004	L	W14	L	1.19
1	b1004	L	W23	H	1.31
1	b1004	L	W16	L	2.09
1	b1004	L	W22	H	1.21
1	b1004	L	W30	H	1.8
1	b1004	L	W18	L	1.11
1	b1004	L	W19	L	1.36
1	b1004	L	W26	H	1.36
1	b1004	L	W21	H	1.98
1	b1004	L	W25	H	1.92
1	b1004	L	W11	L	1.42
1	b1004	L	W27	H	1.2
1	b1004	L	W20	L	1.7
1	b1004	L	W15	L	1.54
1	b1004	L	W12	L	2.83
1	b1004	L	W24	H	2.93
1	b1005	L	W18	L	1.21
1	b1005	L	W14	L	2.03
1	b1005	L	W26	H	0.95
1	b1005	L	W24	H	2.74
1	b1005	L	W22	H	1.36
1	b1005	L	W28	H	1.99
1	b1005	L	W29	H	2.4
1	b1005	L	W16	L	1.07
1	b1005	L	W21	H	2.08
1	b1005	L	W23	H	2.11
1	b1005	L	W13	L	1.08
1	b1005	L	W25	H	1.17
1	b1005	L	W30	H	1.67
1	b1006	L	W18	L	1.3
1	b1006	L	W27	H	1.32
1	b1006	L	W23	H	1.68
1	b1006	L	W30	H	2.85
1	b1006	L	W14	L	1.6
1	b1006	L	W24	H	2.78
1	b1006	L	W22	H	0.84
1	b1006	L	W22	H	0.67
1	b1006	L	W13	L	0.9
1	b1006	L	W19	L	2.42
1	b1006	L	W21	H	1.64
1	b1007	L	W32	H	2.18
1	b1007	L	W05	L	0.73
1	b1007	L	W35	H	1.42
1	b1007	L	W38	H	1.95
1	b1007	L	W01	L	1.69
1	b1007	L	W34	H	2.8
1	b1007	L	W40	H	1.17
1	b1007	L	W08	L	0.95
1	b1008	L	W37	H	1.3
1	b1008	L	W02	L	2.2
1	b1008	L	W35	H	2.1
1	b1008	L	W09	L	1.24
1	b1008	L	W31	H	1.7
1	b1008	L	W01	L	1.24
1	b1008	L	W10	L	1.28
1	b1008	L	W40	H	2.63
1	b1009	L	W02	L	1.56
1	b1009	L	W01	L	1.03
1	b1009	L	W32	H	1.13
1	b1009	L	W35	H	1.75
1	b1009	L	W08	L	1.7
1	b1009	L	W06	L	0.79
1	b1009	L	W07	L	0.29
1	b1009	L	W38	H	0.98
1	b1009	L	W10	L	0.47
1	b1009	L	W34	H	2.58
1	b1009	L	W09	L	1.3
1	b1009	L	W05	L	1.25
1	b1009	L	W31	H	1.23
1	b1010	L	W10	L	2.14
1	b1010	L	W40	H	2.64
1	b1010	L	W04	L	1.37
1	b1010	L	W03	L	1.06
1	b1010	L	W08	L	0.65
1	b1010	L	W38	H	1.13
1	b1010	L	W07	L	0.74
1	b1010	L	W32	H	1.5
1	b1010	L	W36	H	1.01
1	b1011	L	W02	L	1.58
1	b1011	L	W34	H	2.11
1	b1011	L	W05	L	2.19
1	b1011	L	W09	L	4.21
1	b1011	L	W03	L	2.04
1	b1011	L	W37	H	1.19
1	b1011	L	W06	L	1.47
1	b1012	L	W33	H	0.99
[truncated: 1,442 more rows]
